# Supplementary material for: Identification and Expression Analyses of miRNAs from Two Contrasting Flower Color Cultivars of Canna by Deep Sequencing
Source: PubMed Central journal article supplement (PMC4723037; doi:10.1371/journal.pone.0147499), 2016-01-22

# S1 Figure miRNA analysis pipeline

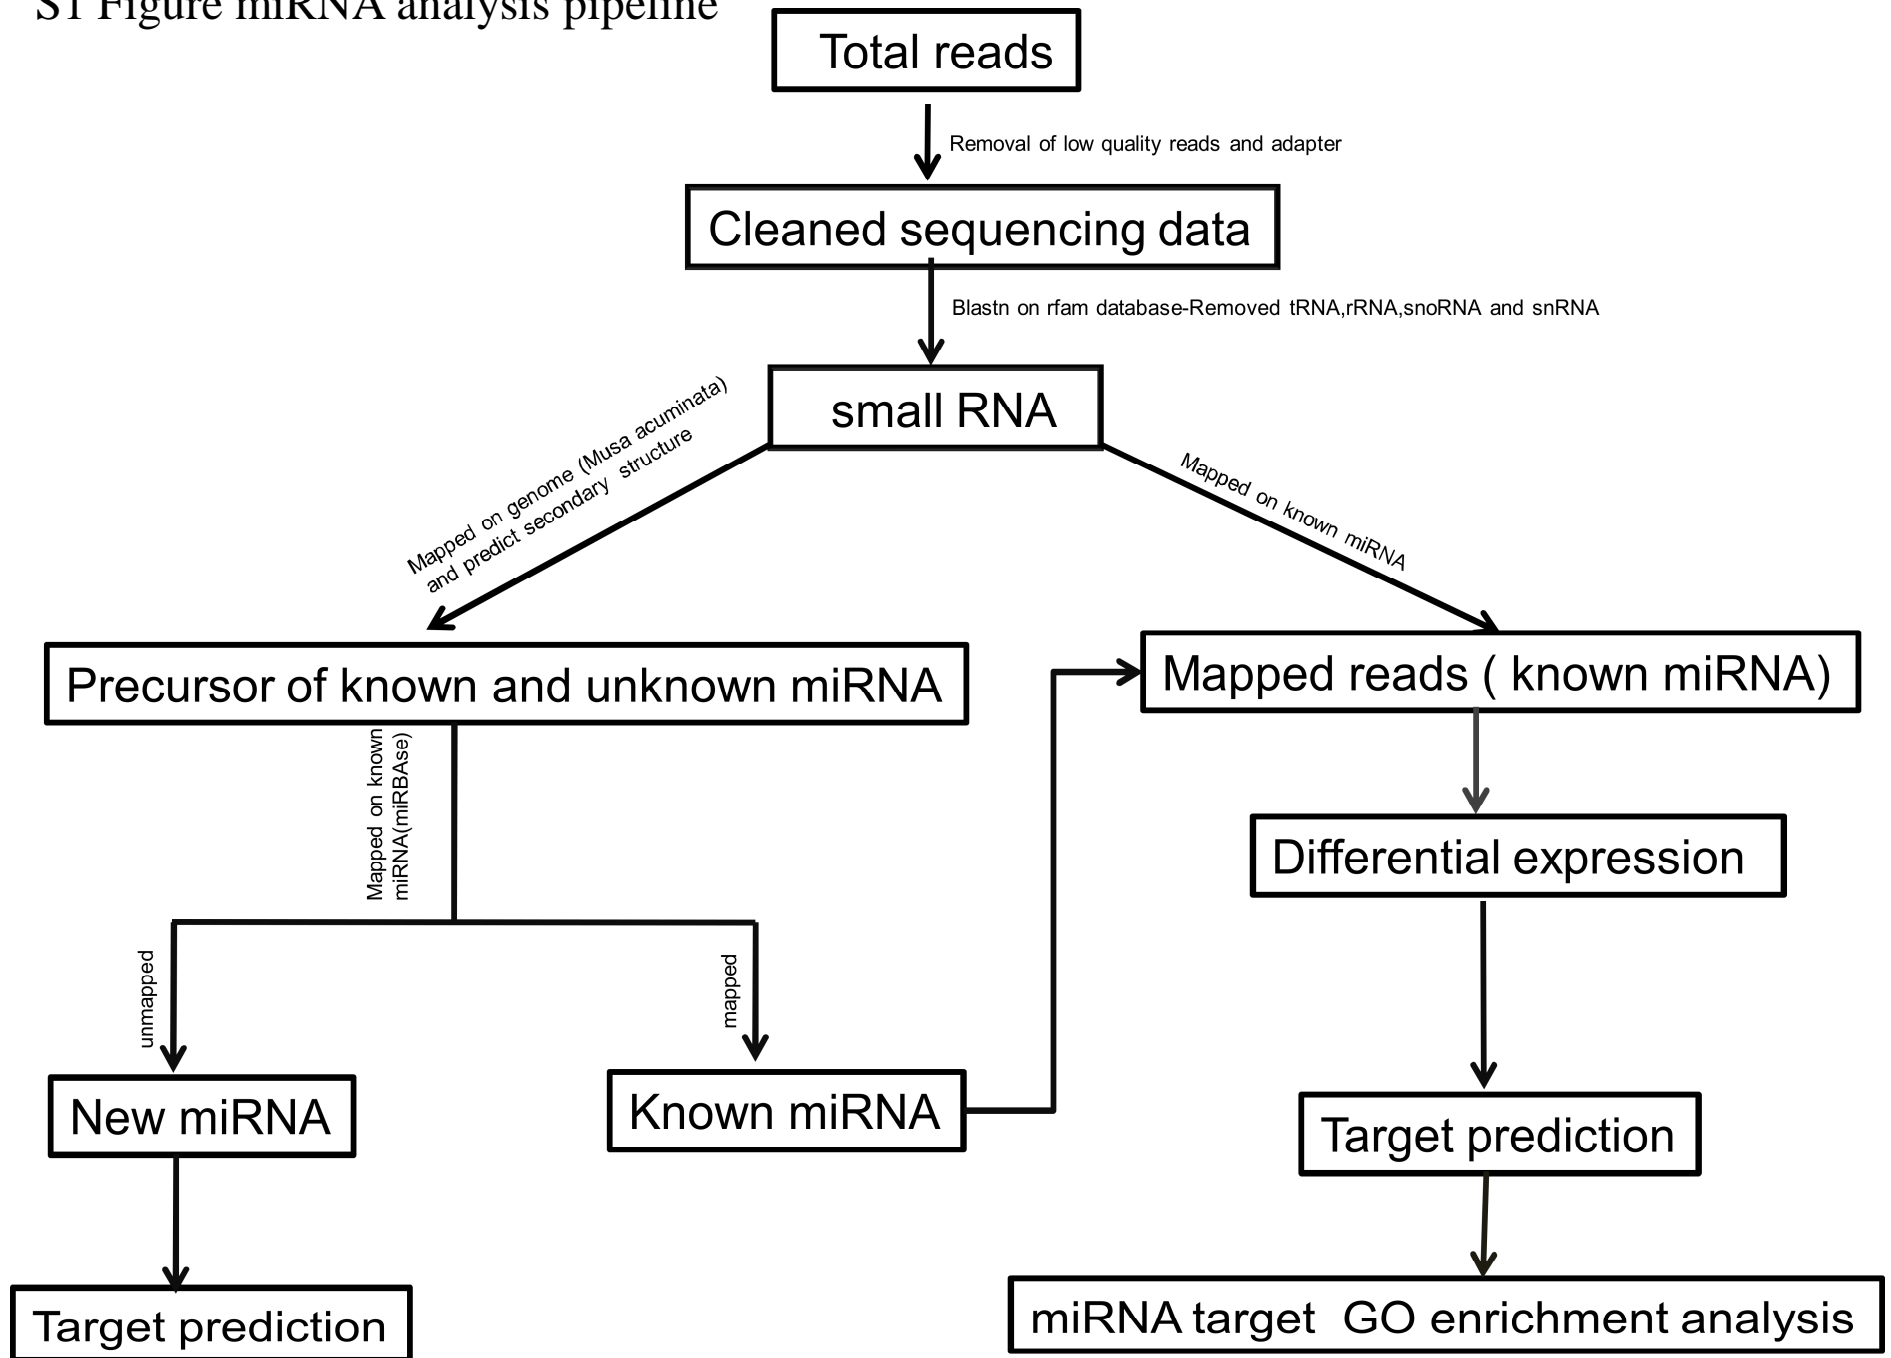

Supplement: pone.0147499.s001.pdf [file pone.0147499.s001.pdf]
