# Supplementary material for: Identification and Expression Analyses of miRNAs from Two Contrasting Flower Color Cultivars of Canna by Deep Sequencing
Source: PubMed Central journal article supplement (PMC4723037; doi:10.1371/journal.pone.0147499), 2016-01-22
Supplement: pone.0147499.s002.pdf [file pone.0147499.s002.pdf]

**S2 Figure Secondary structures of 50 putative novel *Canna* specific miRNAs and miRNAs\* counterparts**

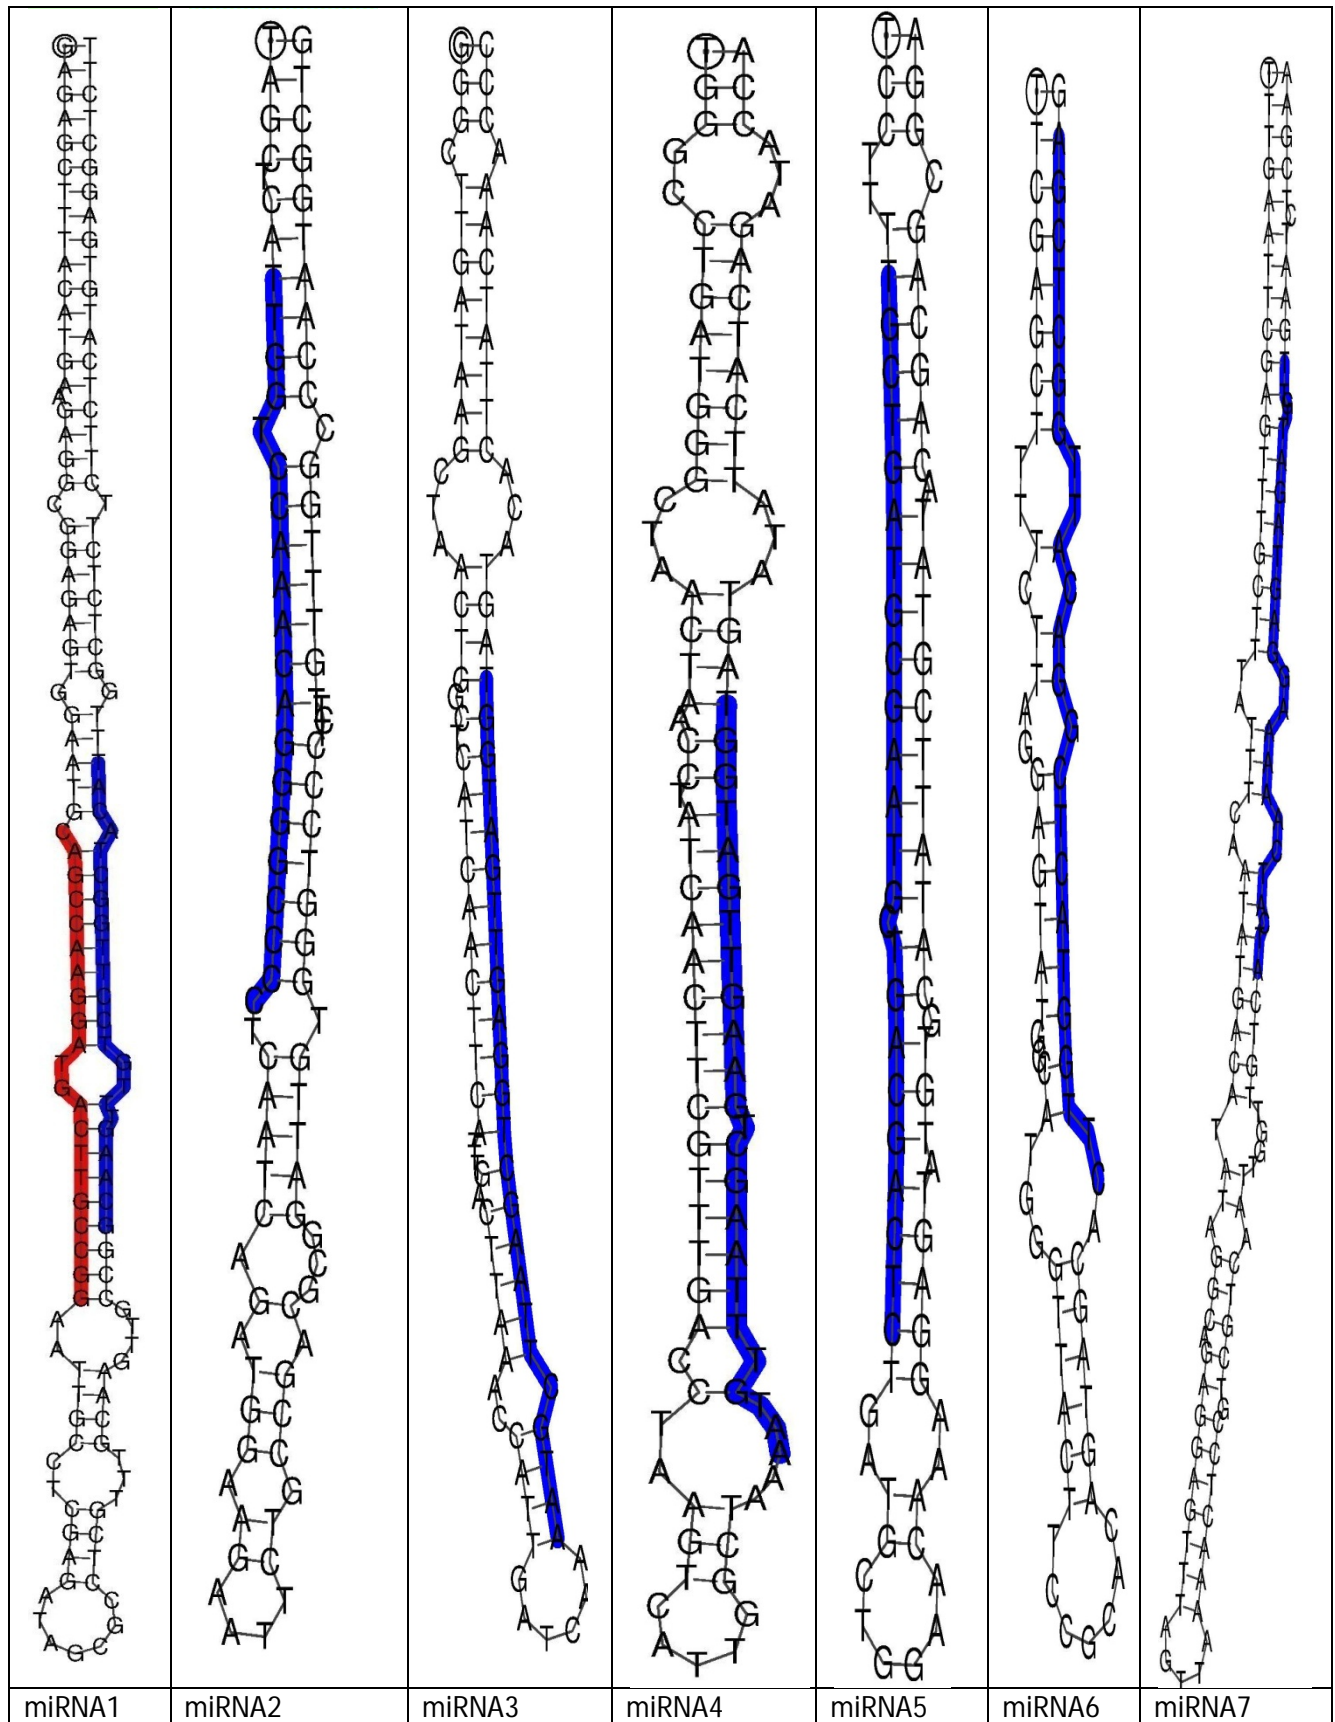

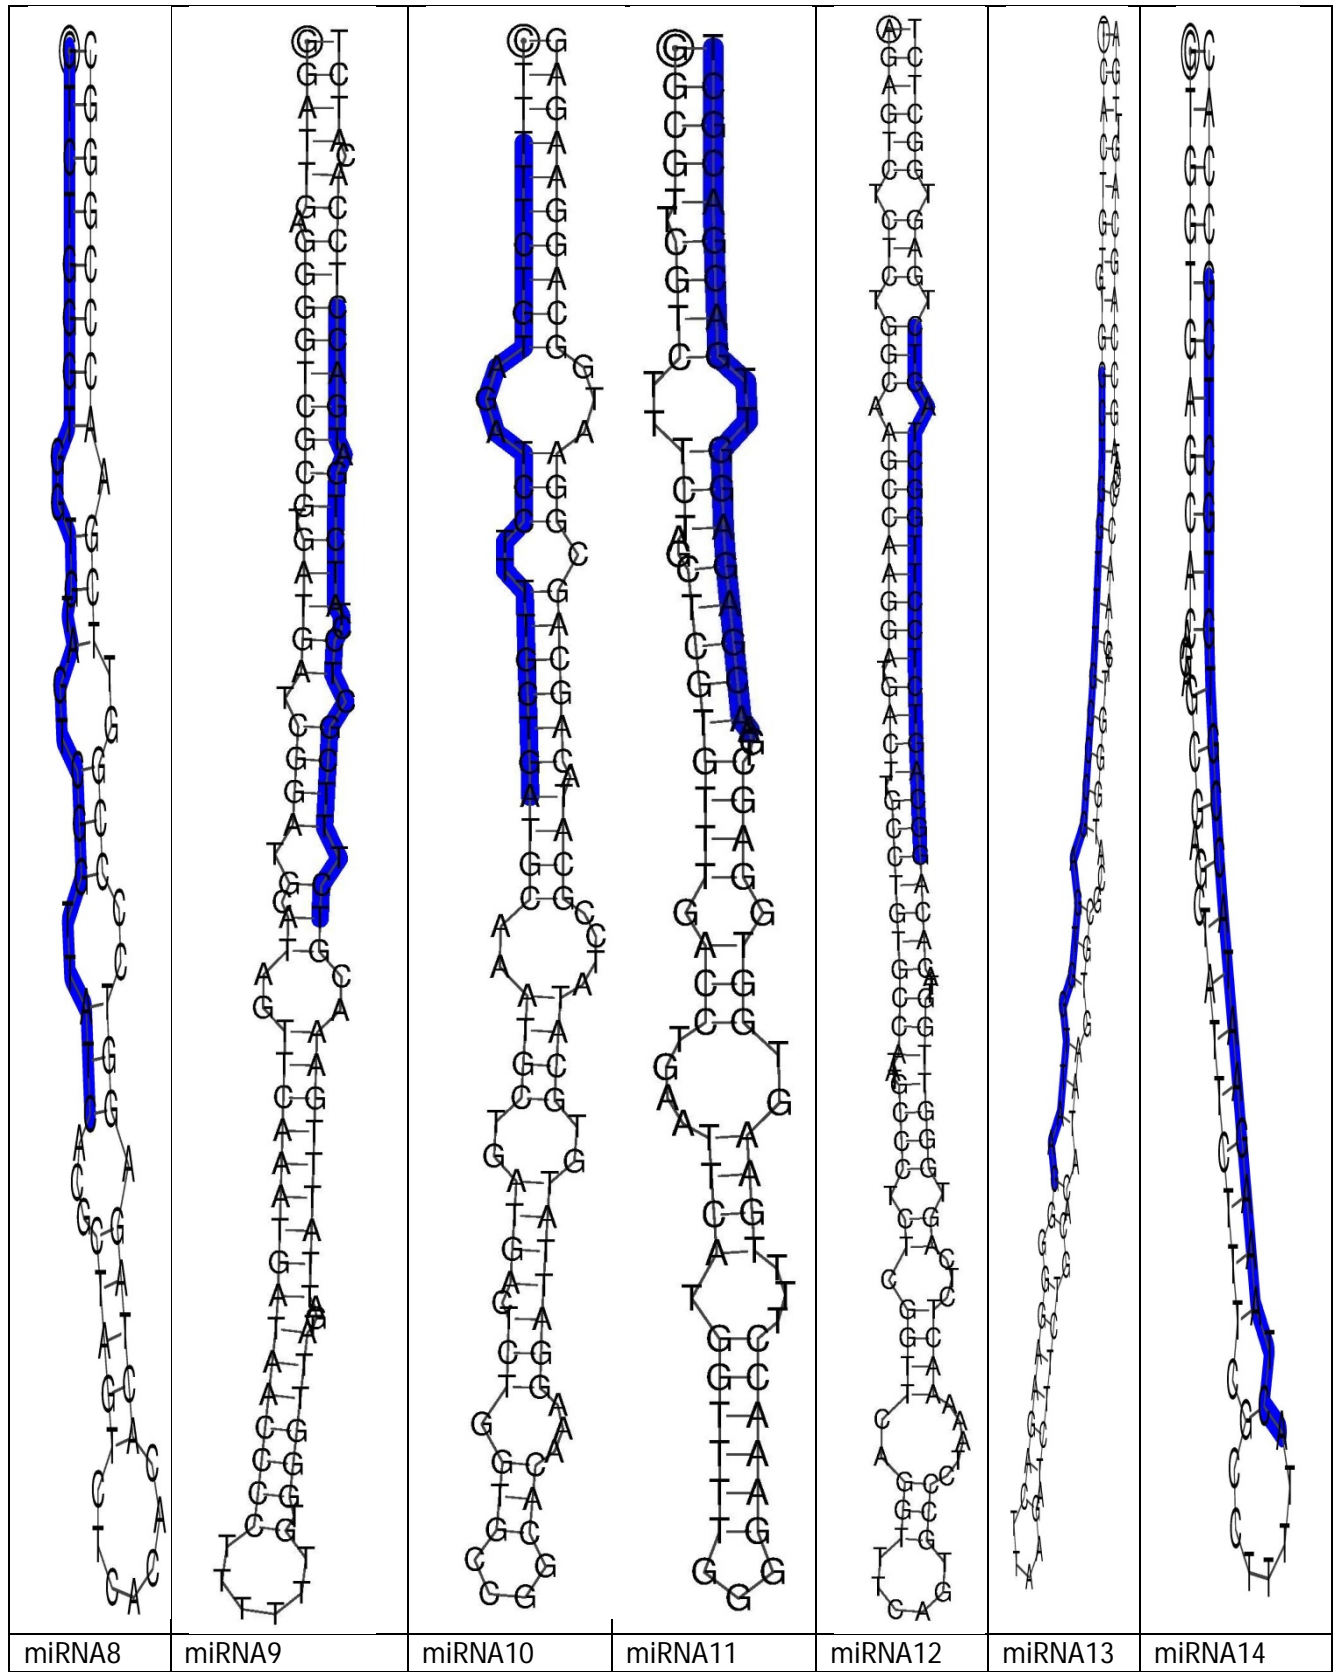

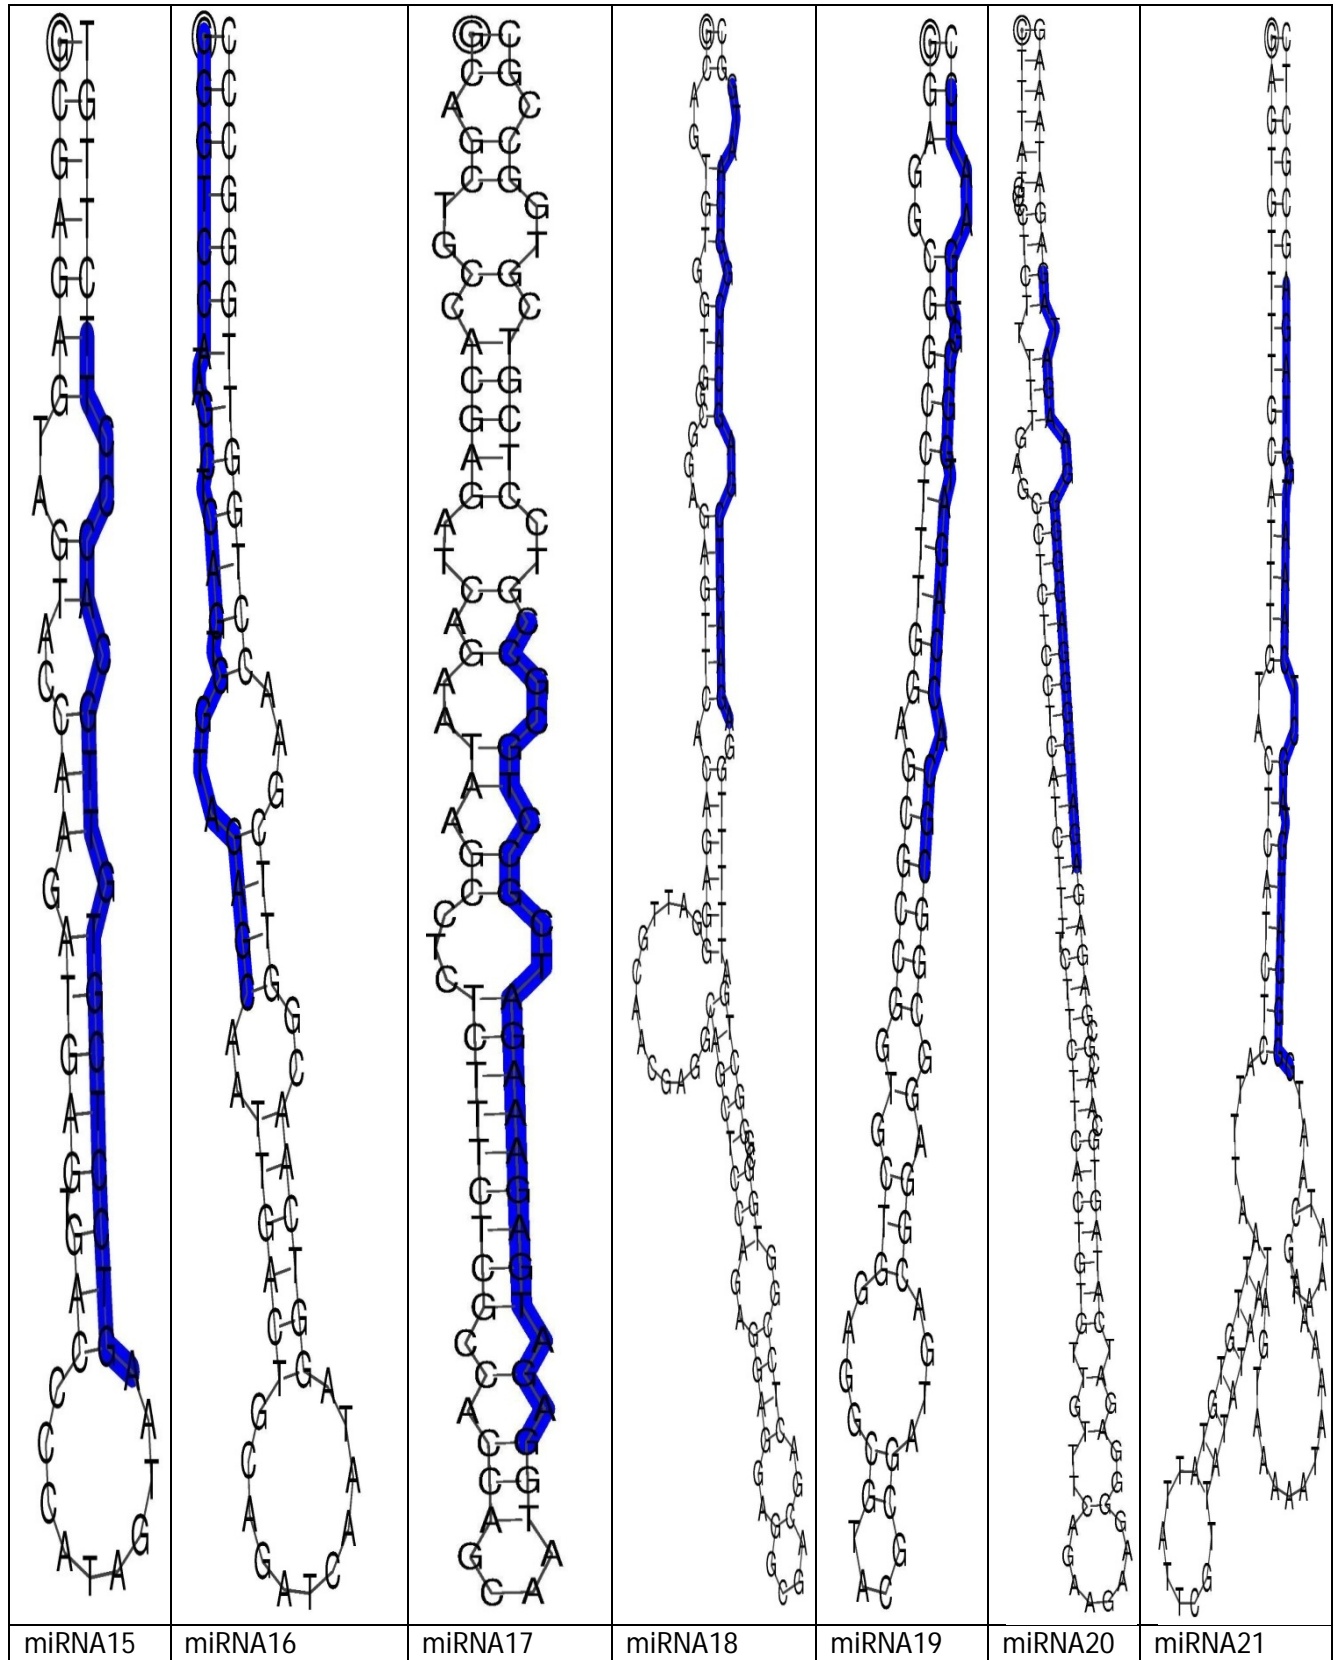

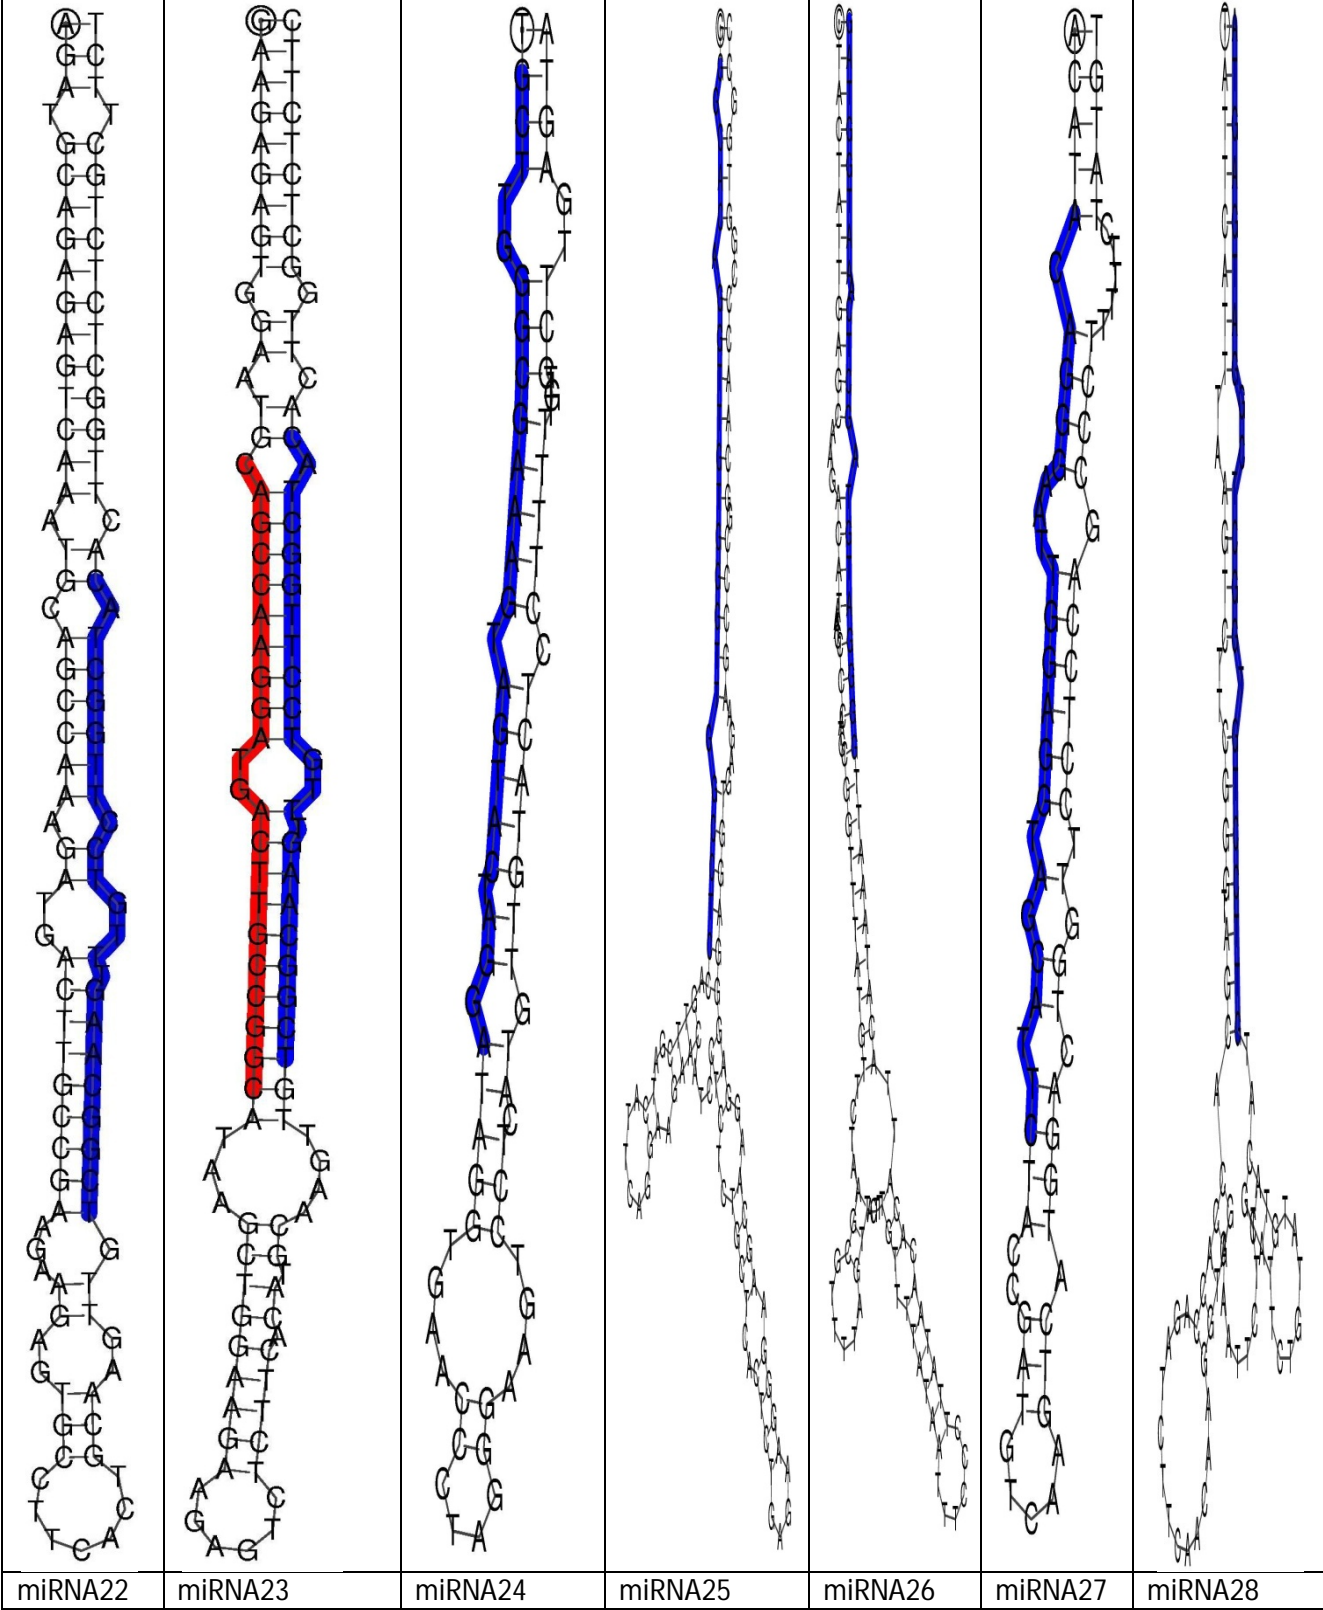

|                                                                                                                                                                                                                                       |                                                                                                                                                                                                                                       |                                                                                                                                                                                                                                       |                                                                                                                                                                                                                                       |                                                                                                                                                                                                                                        |                                                                                                                                                                                                                                         |                                                                                                                                                                                                                                         |
|---------------------------------------------------------------------------------------------------------------------------------------------------------------------------------------------------------------------------------------|---------------------------------------------------------------------------------------------------------------------------------------------------------------------------------------------------------------------------------------|---------------------------------------------------------------------------------------------------------------------------------------------------------------------------------------------------------------------------------------|---------------------------------------------------------------------------------------------------------------------------------------------------------------------------------------------------------------------------------------|----------------------------------------------------------------------------------------------------------------------------------------------------------------------------------------------------------------------------------------|-----------------------------------------------------------------------------------------------------------------------------------------------------------------------------------------------------------------------------------------|-----------------------------------------------------------------------------------------------------------------------------------------------------------------------------------------------------------------------------------------|
| 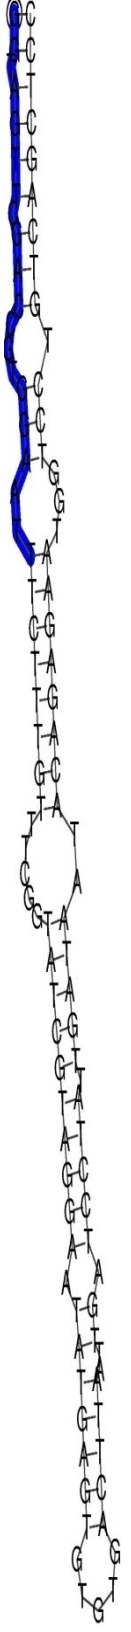 <p>Secondary structure of miRNA29, showing a long stem-loop structure with several internal loops and bulges. The stem is highlighted in blue.</p> |  <p>Secondary structure of miRNA30, showing a long stem-loop structure with several internal loops and bulges. The stem is highlighted in blue.</p> |  <p>Secondary structure of miRNA31, showing a long stem-loop structure with several internal loops and bulges. The stem is highlighted in blue.</p> |  <p>Secondary structure of miRNA32, showing a long stem-loop structure with several internal loops and bulges. The stem is highlighted in blue.</p> |  <p>Secondary structure of miRNA33, showing a long stem-loop structure with several internal loops and bulges. The stem is highlighted in blue.</p> |  <p>Secondary structure of miRNA34, showing a long stem-loop structure with several internal loops and bulges. The stem is highlighted in blue.</p> |  <p>Secondary structure of miRNA35, showing a long stem-loop structure with several internal loops and bulges. The stem is highlighted in blue.</p> |
| miRNA29                                                                                                                                                                                                                               | miRNA30                                                                                                                                                                                                                               | miRNA31                                                                                                                                                                                                                               | miRNA32                                                                                                                                                                                                                               | miRNA33                                                                                                                                                                                                                                | miRNA34                                                                                                                                                                                                                                 | miRNA35                                                                                                                                                                                                                                 |

|                                                                                                                                                                                                                                                                                                                                        |                                                                                                                                                                                                                                                                                                                                       |                                                                                                                                                                                                                                                                                                                                        |                                                                                                                                                                                                                                                                                                                                        |                                                                                                                                                                                                                                                                                                                                         |                                                                                                                                                                                                                                                                                                                                          |                                                                                                                                                                                                                                                                                                                                          |
|----------------------------------------------------------------------------------------------------------------------------------------------------------------------------------------------------------------------------------------------------------------------------------------------------------------------------------------|---------------------------------------------------------------------------------------------------------------------------------------------------------------------------------------------------------------------------------------------------------------------------------------------------------------------------------------|----------------------------------------------------------------------------------------------------------------------------------------------------------------------------------------------------------------------------------------------------------------------------------------------------------------------------------------|----------------------------------------------------------------------------------------------------------------------------------------------------------------------------------------------------------------------------------------------------------------------------------------------------------------------------------------|-----------------------------------------------------------------------------------------------------------------------------------------------------------------------------------------------------------------------------------------------------------------------------------------------------------------------------------------|------------------------------------------------------------------------------------------------------------------------------------------------------------------------------------------------------------------------------------------------------------------------------------------------------------------------------------------|------------------------------------------------------------------------------------------------------------------------------------------------------------------------------------------------------------------------------------------------------------------------------------------------------------------------------------------|
| 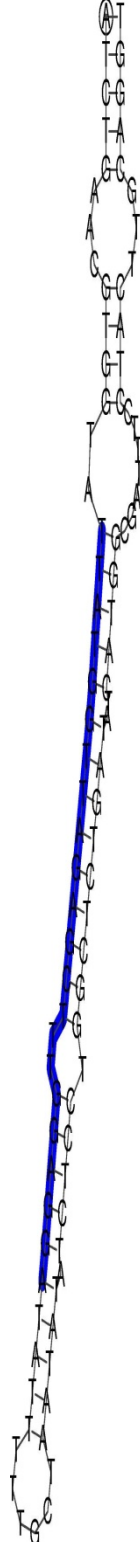 <p>Secondary structure of miRNA36. The molecule is a single strand of RNA with several stem-loops. A central stem is highlighted in blue, indicating a highly conserved region. The 5' end has a 5' cap (m7G) and the 3' end has a poly-A tail.</p> |  <p>Secondary structure of miRNA37. The molecule is a single strand of RNA with several stem-loops. A central stem is highlighted in red, indicating a highly conserved region. The 5' end has a 5' cap (m7G) and the 3' end has a poly-A tail.</p> |  <p>Secondary structure of miRNA38. The molecule is a single strand of RNA with several stem-loops. A central stem is highlighted in blue, indicating a highly conserved region. The 5' end has a 5' cap (m7G) and the 3' end has a poly-A tail.</p> |  <p>Secondary structure of miRNA39. The molecule is a single strand of RNA with several stem-loops. A central stem is highlighted in blue, indicating a highly conserved region. The 5' end has a 5' cap (m7G) and the 3' end has a poly-A tail.</p> |  <p>Secondary structure of miRNA40. The molecule is a single strand of RNA with several stem-loops. A central stem is highlighted in blue, indicating a highly conserved region. The 5' end has a 5' cap (m7G) and the 3' end has a poly-A tail.</p> |  <p>Secondary structure of miRNA41. The molecule is a single strand of RNA with several stem-loops. A central stem is highlighted in blue, indicating a highly conserved region. The 5' end has a 5' cap (m7G) and the 3' end has a poly-A tail.</p> |  <p>Secondary structure of miRNA42. The molecule is a single strand of RNA with several stem-loops. A central stem is highlighted in blue, indicating a highly conserved region. The 5' end has a 5' cap (m7G) and the 3' end has a poly-A tail.</p> |
| miRNA36                                                                                                                                                                                                                                                                                                                                | miRNA37                                                                                                                                                                                                                                                                                                                               | miRNA38                                                                                                                                                                                                                                                                                                                                | miRNA39                                                                                                                                                                                                                                                                                                                                | miRNA40                                                                                                                                                                                                                                                                                                                                 | miRNA41                                                                                                                                                                                                                                                                                                                                  | miRNA42                                                                                                                                                                                                                                                                                                                                  |

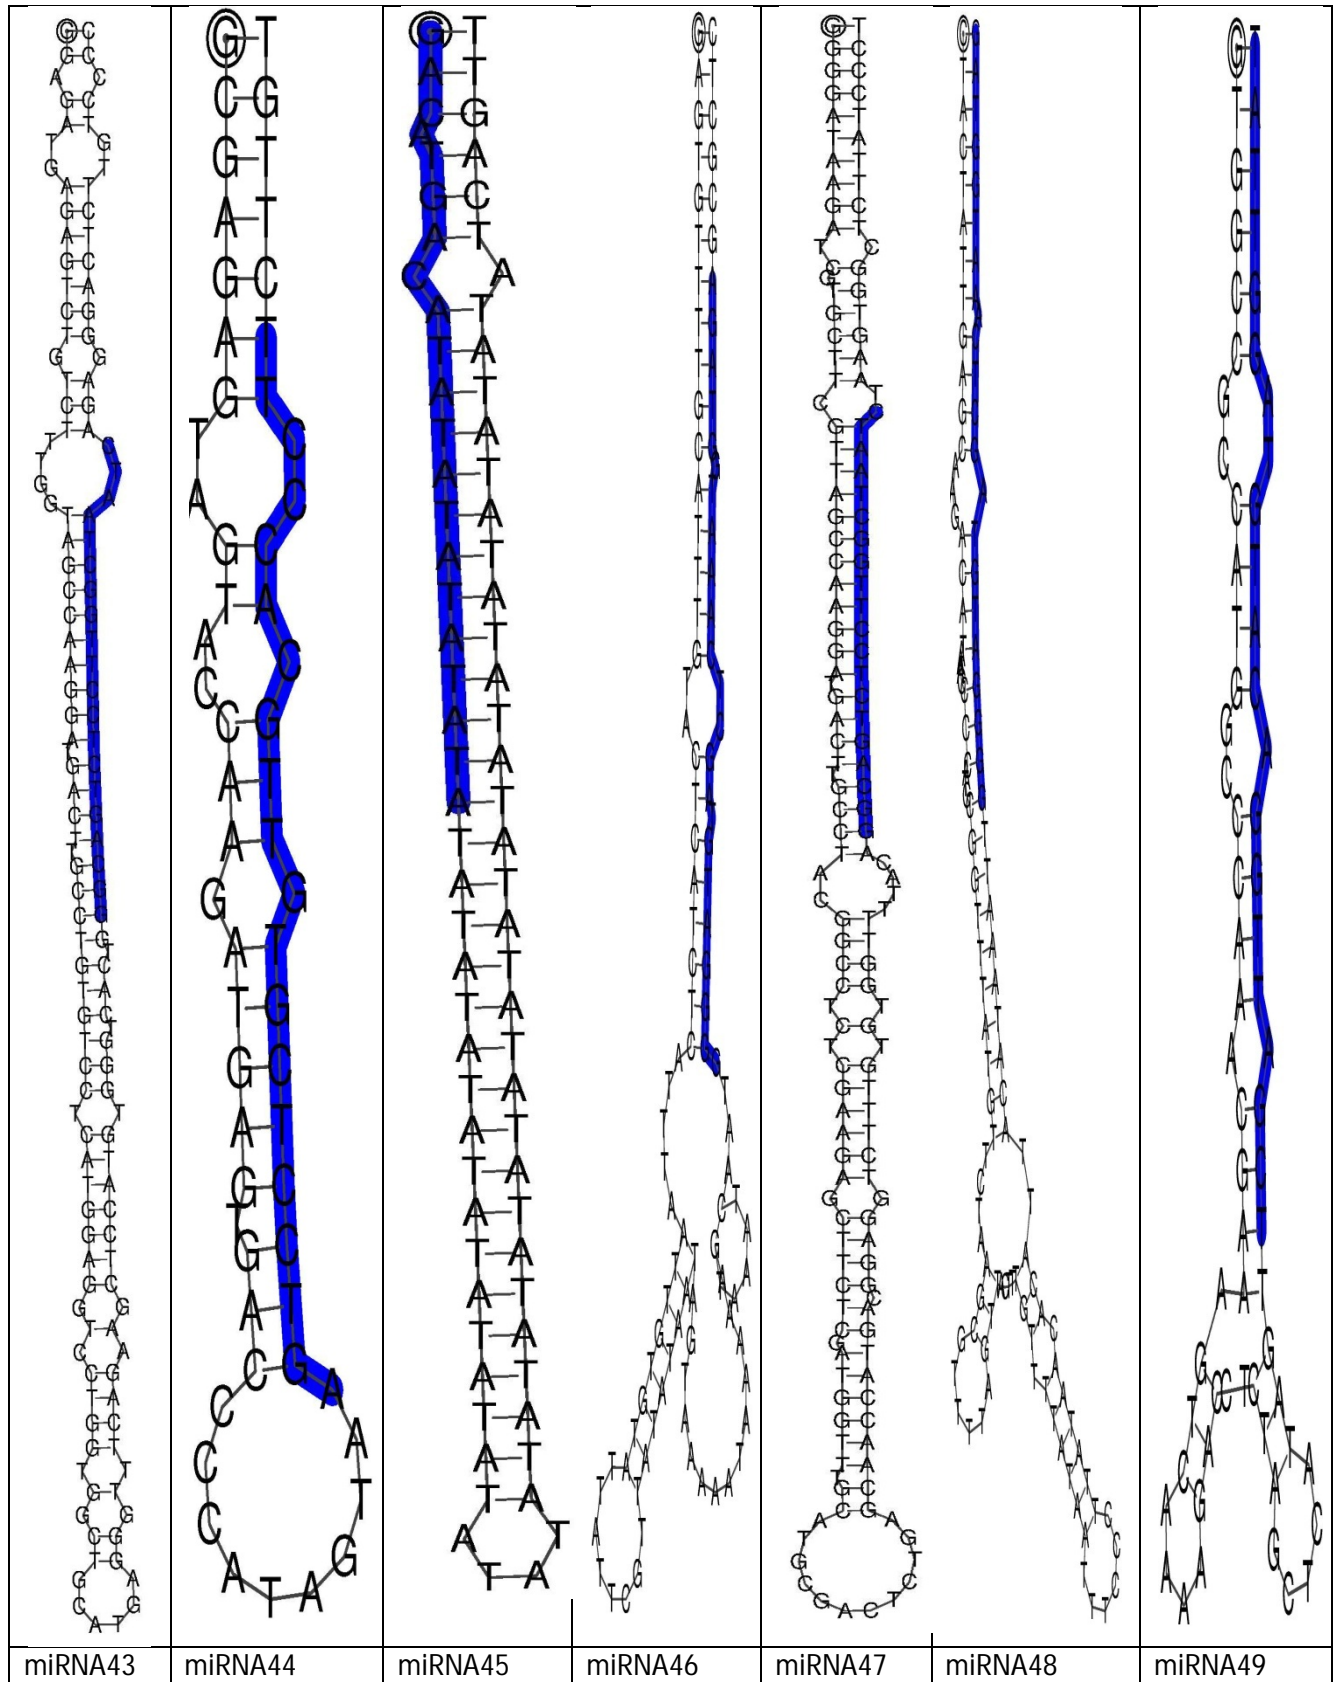

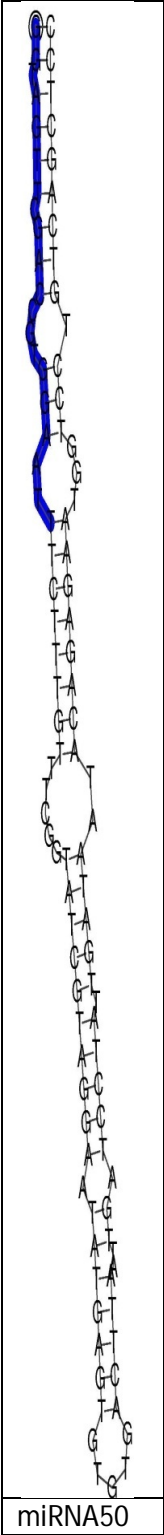

miRNA50
