# Supplementary material for: Identification and Expression Analyses of miRNAs from Two Contrasting Flower Color Cultivars of Canna by Deep Sequencing
Source: PLoS One. 2016 Jan 22;11(1):e0147499. doi: 10.1371/journal.pone.0147499 (PMC4723037; doi:10.1371/journal.pone.0147499)
Supplement: S1 Table — (XLSX) [file pone.0147499.s004.xlsx]

## Sheet: Primers
S1 Table Primers sequence
Known miRNAs Primers
miRNA	Primers sequences
miR157-5p	CGGGCGGTTGACAGAAGATAGA
miR158	GGCGGGGCCAAATGTAGAC
miR159	GGCGGTTTGGATTGAAGGGA
miR162-3p	GGCGGTCGATAAACCTCTGC
miR168-5p	GGCTCGCTTGGTGCAGGT
miR528-5p	GCTGGAAGGGGCATGCA
miR828	TCTTGCTTAAATGAGTATTCCA
5.8S rRNA_F	GCAACGGATATCTCGGCTCTCGC
5.8S rRNA_R	GGATGGCCTCGGGCGCAACT
Novel miRNA primers	Forword Primer Sequences	Reverse Primer sequences (Stem loop primers)
miR8	GGCGGGTACGAGCCTATAGA	GTCGTATCCAGTGCAGGGTCCGAGGTATTCGCACTGGATACGACATCTGT
miR11	GGCGAGATGAGAAAGATCGCC	GTCGTATCCAGTGCAGGGTCCGAGGTATTCGCACTGGATACGACGGCGCA
miR13	GGCGGGTAGTTCGACCGT	GTCGTATCCAGTGCAGGGTCCGAGGTATTCGCACTGGATACGACAATTCC
miR41	GGCGGTTGGACTGAAGGGAG	GTCGTATCCAGTGCAGGGTCCGAGGTATTCGCACTGGATACGACAAGGAG
stem loop reverse primer		CCAGTGCAGGGTCCGAGGT
miRNA target primers
GSMUA_Achr11T00410_Putative_Myb-related_protein_Myb4	GGCAAGAGTTGCAGGTTGAG	GTCGCTTGATGTGTGTGTTCC
GSMUA_Achr3T22530_Chalcone_synthase_J	CAGAGATACCCAAAGGTTGGAAGGC	AACCATCCTTCCCGACAGCGAT
GSMUA_Achr8T14540_Putative_Myb-related_protein_308	GAGAGGGAAAGTGGAACCAA	GGCTTCAAATAATTCAACCATCT
GSMUA_Achr3T15320_Laccase-2	AACCATCTCTCCCTCCCATC	TTCCTAAACCGATGGCAAAG
GSMUA_Achr10T12070_001_Auxin_response_factor_24	GGAAATGACCTGGTTGGAAA	GACTCTTTGCTGCCATCCTC
Primers for RLM-RACE
Putative Dipeptidyl peptidase 8 outer primer	CAATACCTACGAAATAAGGGCATC
Putative Dipeptidyl peptidase 8 inner primer	CTGTTGACATGAGAGCTCAATACC
