# Supplementary material for: Identification and Expression Analyses of miRNAs from Two Contrasting Flower Color Cultivars of Canna by Deep Sequencing
Source: PLoS One. 2016 Jan 22;11(1):e0147499. doi: 10.1371/journal.pone.0147499 (PMC4723037; doi:10.1371/journal.pone.0147499)
Supplement: S9 Table — (XLSX) [file pone.0147499.s012.xlsx]

## Sheet: flower development Related miRN
Supplementary Data 9:miRNA involve in flower development
Related Type	miRNA_Acc.	Target	Expectation	UPE	miRNA_start	miRNA_end	Target_start	Target_end	miRNA_aligned_fragment	Target_aligned_fragment	Inhibition
pollen tube development	miR159	GSMUA_Achr2T02130_001_Probable_protein_disulfide-isomerase_A6	3	15.624	1	20	322	341	UUUGGUUUGAAGGGAGCUUU	AAAGGUUCCUUAGAACCAAA	Translation
pollination	miR159	GSMUA_Achr2T02130_001_Probable_protein_disulfide-isomerase_A6	3	15.624	1	20	322	341	UUUGGUUUGAAGGGAGCUUU	AAAGGUUCCUUAGAACCAAA	Translation
flower development	miR159	GSMUA_Achr4T29380_001_Flowering_time_control_protein_FY	3	21.283	1	20	849	868	UAUGGAUUGAAUGGAGCUCU	AGAGCUCUGUUCAUUCCAUG	Cleavage
floral whorl development	miR160	GSMUA_Achr5T03960_001_Auxin_response_factor_18	2	24.333	1	20	1109	1128	CCUGGCUCCCUGUAUGCCAC	CAGGCAUACAGGGAGCCAGG	Cleavage
flower development	miR160	GSMUA_Achr5T03960_001_Auxin_response_factor_18	2	24.333	1	20	1109	1128	CCUGGCUCCCUGUAUGCCAC	CAGGCAUACAGGGAGCCAGG	Cleavage
flower development	miR162a	GSMUA_Achr8T12350_001_Endoribonuclease_Dicer_homolog_1	2	23.913	1	21	3097	3118	UCGAUAAAA-CUCUGCAUCCAG	CUGGAUGCAGAGGUUUUAUCGA	Translation
vegetative to reproductive phase transition of meristem	miR162a	GSMUA_Achr8T12350_001_Endoribonuclease_Dicer_homolog_1	2	23.913	1	21	3097	3118	UCGAUAAAA-CUCUGCAUCCAG	CUGGAUGCAGAGGUUUUAUCGA	Translation
fruit development	miR164	GSMUA_Achr5T00500_001_no_apical_meristem_protein,_putative,_expressed	1	20.02	1	20	615	634	UGGAGAAGCAGGGCACGUGC	GCAAGUGCCCUGCUUCUCCA	Cleavage
fruit development	miR164a	GSMUA_Achr11T25720_001_NAC_domain-containing_protein_21/22	2.5	21.36	1	20	625	644	UUGGAGAAGCAGGUCACGUG	CAAGUGUCCUGCUUCUCCGA	Cleavage
floral whorl development	miR164a	GSMUA_Achr7T11500_001_no_apical_meristem_protein,_putative,_expressed	1	18.002	1	20	595	614	UUGGAGAAGCAGGUCACGUG	CAUGUGACCUGCUUCUCCGA	Cleavage
flower development	miR164a	GSMUA_Achr7T11500_001_no_apical_meristem_protein,_putative,_expressed	1	18.002	1	20	595	614	UUGGAGAAGCAGGUCACGUG	CAUGUGACCUGCUUCUCCGA	Cleavage
fruit development	miR164a	GSMUA_Achr7T23040_001_Putative_Regulatory_protein_viviparous-1	3	17.074	1	21	144	164	UGGAGGAGCAGGGCACGUGCA	UGCCCGUGCACUCCUCCUCCA	Translation
multicellular organism reproduction	miR164a	GSMUA_Achr7T23040_001_Putative_Regulatory_protein_viviparous-1	3	17.074	1	21	144	164	UGGAGGAGCAGGGCACGUGCA	UGCCCGUGCACUCCUCCUCCA	Translation
reproductive process in a multicellular organism	miR164a	GSMUA_Achr7T23040_001_Putative_Regulatory_protein_viviparous-1	3	17.074	1	21	144	164	UGGAGGAGCAGGGCACGUGCA	UGCCCGUGCACUCCUCCUCCA	Translation
fruit development	miR166	GSMUA_Achr10T04900_001_Homeobox-leucine_zipper_protein_ROC2	3	20.993	1	20	891	910	UCGCAUCAGGCUUCAUUCCC	GGGAAUGAAGUCGGAGGCGA	Cleavage
floral whorl development	miR166	GSMUA_Achr10T12070_001_Auxin_response_factor_24	3	16.629	1	21	1166	1186	UCGGAGCAGGCUUCAUUCUCC	GGAAAAUUGAGCCUGCUCUGA	Cleavage
flower development	miR166	GSMUA_Achr10T12070_001_Auxin_response_factor_24	3	16.629	1	21	1166	1186	UCGGAGCAGGCUUCAUUCUCC	GGAAAAUUGAGCCUGCUCUGA	Cleavage
multicellular organism reproduction	miR166	GSMUA_Achr10T12070_001_Auxin_response_factor_24	3	16.629	1	21	1166	1186	UCGGAGCAGGCUUCAUUCUCC	GGAAAAUUGAGCCUGCUCUGA	Cleavage
reproductive process in a multicellular organism	miR166	GSMUA_Achr10T12070_001_Auxin_response_factor_24	3	16.629	1	21	1166	1186	UCGGAGCAGGCUUCAUUCUCC	GGAAAAUUGAGCCUGCUCUGA	Cleavage
flower development	miR166	GSMUA_Achr3T21970_001_Putative_Receptor-like_protein_kinase_HAIKU2	3	20.376	1	20	1378	1397	UCGGAGAAGGCUUCAUUCCC	GGAGAUGAAGCAUUCUCCGG	Translation
flower development	miR166	GSMUA_Achr5T27450_001_Probable_gibberellin_receptor_GID1L3	2.5	20.262	1	20	35	54	UCGGAUCAGGCUUCCUUCCC	GGGAGGGAAGACUGAUCUGG	Translation
flower development	miR166	GSMUA_Achr8T32560_001_Gibberellin_20_oxidase_2	3	22.63	1	20	55	74	UCGGAGCAGGCUUCAUUCUC	GAGAGAGAAGCCGGCUCCGG	Cleavage
vegetative to reproductive phase transition of meristem	miR166	GSMUA_Achr8T32560_001_Gibberellin_20_oxidase_2	3	22.63	1	20	55	74	UCGGAGCAGGCUUCAUUCUC	GAGAGAGAAGCCGGCUCCGG	Cleavage
pollination	miR166b	GSMUA_Achr11T23440_001_Cellulose_synthase-like_protein_D2	3	21.846	1	20	1108	1127	UCGGAGCAGGCUUCAUUCUU	AAGAAUAAAGUCCGCUCUGA	Cleavage
flower development	miR166e	GSMUA_Achr7T00740_001_AP2-like_ethylene-responsive_transcription_factor_ANT	2	21.025	1	20	479	497	CUCGGCACAGGCUUCAUUCC	GGAAUGAAGCC-GUGCCGAG	Translation
multicellular organism reproduction	miR166e	GSMUA_Achr7T00740_001_AP2-like_ethylene-responsive_transcription_factor_ANT	2	21.025	1	20	479	497	CUCGGCACAGGCUUCAUUCC	GGAAUGAAGCC-GUGCCGAG	Translation
reproductive process in a multicellular organism	miR166e	GSMUA_Achr7T00740_001_AP2-like_ethylene-responsive_transcription_factor_ANT	2	21.025	1	20	479	497	CUCGGCACAGGCUUCAUUCC	GGAAUGAAGCC-GUGCCGAG	Translation
sexual reproduction	miR166e	GSMUA_Achr7T00740_001_AP2-like_ethylene-responsive_transcription_factor_ANT	2	21.025	1	20	479	497	CUCGGCACAGGCUUCAUUCC	GGAAUGAAGCC-GUGCCGAG	Translation
fruit development	miR166f	GSMUA_Achr4T01370_001_Putative_Target_of_rapamycin	3	19.527	1	20	4107	4126	UCUCGUACCAGGGUUCAUUC	CAAGGAAUCCUGGUAUGAGA	Cleavage
pollen development	miR168	GSMUA_Achr10T17890_001_Probable_receptor_protein_kinase_TMK1	2.5	20.105	1	20	1772	1791	UUCGUUUGGUGCAGGUCGGG	UCCGACUUGCACCAGAUGGA	Cleavage
pollen development	miR168	GSMUA_Achr1T05180_001_Cell_division_protease_ftsH_homolog_5,_mitochondrial	3	24.706	1	20	1578	1597	UUGCUUGGUGCAGGUCGGGA	AUCCGACCUGCAGCAGGCAA	Cleavage
fruit development	miR168	GSMUA_Achr1T07120_001_Protein_argonaute_1A	1.5	21.105	1	20	411	430	UUGCUUGGUGCAGGUCGGGA	UCCCGAUCUGCACCAAGCAU	Cleavage
floral whorl development	miR168	GSMUA_Achr3T26230_001_Homeobox_protein_knotted-1-like_6	2.5	12.182	1	20	112	131	UUCGCUUGGAGCAGGUCGGG	CCCAACCUGCUCCAAGCAAA	Cleavage
flower development	miR168	GSMUA_Achr3T26230_001_Homeobox_protein_knotted-1-like_6	2.5	12.182	1	20	112	131	UUCGCUUGGAGCAGGUCGGG	CCCAACCUGCUCCAAGCAAA	Cleavage
flower development	miR168	GSMUA_Achr6T26350_001_Putative_ABC_transporter_B_family_member_8	3	24.486	1	20	1965	1983	UCCCUUGGUGCAGGUCGGGA	UUCCGACCUG-GCCAAGGGA	Translation
pollen tube development	miR168	GSMUA_Achr6T27800_001_Probable_xyloglucan_glycosyltransferase_6	3	24.318	1	20	650	669	UCGCUUGGUGCACGUCGGGA	UCCCGAUGUGUAACGAGCGG	Cleavage
pollination	miR168	GSMUA_Achr6T27800_001_Probable_xyloglucan_glycosyltransferase_6	3	24.318	1	20	650	669	UCGCUUGGUGCACGUCGGGA	UCCCGAUGUGUAACGAGCGG	Cleavage
flower development	miR168	GSMUA_Achr8T24490_001_Putative_Transcription_factor_bHLH49	3	23.04	1	20	330	349	UUCGCUUGGUGAAGGUCGGG	UUCGGCUUUCAUCAAGCGAG	Cleavage
floral whorl development	miR168	GSMUA_Achr9T00190_001_Putative_Receptor_protein_kinase_CLAVATA1	2	17.173	1	20	98	117	UCGCUUGGUGGAGGUCGGGA	UCCUGAUCUCCAUCAAGCGG	Cleavage
flower development	miR168	GSMUA_Achr9T00190_001_Putative_Receptor_protein_kinase_CLAVATA1	2	17.173	1	20	98	117	UCGCUUGGUGGAGGUCGGGA	UCCUGAUCUCCAUCAAGCGG	Cleavage
fruit development	miR171	GSMUA_Achr1T09470_001_Protein_kinase_G11A	3	17.174	1	21	642	662	UGAUUCAGCCGUUCCAAUAUC	GAUAUUGCAAUGCCUGGAUCA	Translation
pollen tube development	miR171	GSMUA_Achr1T09470_001_Protein_kinase_G11A	3	17.174	1	21	642	662	UGAUUCAGCCGUUCCAAUAUC	GAUAUUGCAAUGCCUGGAUCA	Translation
pollination	miR171	GSMUA_Achr1T09470_001_Protein_kinase_G11A	3	17.174	1	21	642	662	UGAUUCAGCCGUUCCAAUAUC	GAUAUUGCAAUGCCUGGAUCA	Translation
fruit development	miR171	GSMUA_Achr5T24030_001_Putative_Ethanolamine_kinase_1_(Fragment)	2	11.587	1	21	436	456	UGAUUGAGCCGUGCCAUUUUC	GGGAAUGGCAUGGUUCAAUCA	Cleavage
fruit development	miR171	GSMUA_Achr9T09850_001_Guanine_nucleotide-binding_protein_subunit_beta	3	17.827	1	20	191	210	UGAAUGAGCCGUGCCAAUAU	AUACUGGCAAGGUUUAUUCA	Translation
fruit development	miR319c	GSMUA_Achr3T03540_001_Putative_TCP1_protein	3	14.514	1	21	877	897	AUUGGACUGAAGGGAGCUCCU	AGGGGACCCCUUCAGUCCAGU	Cleavage
fertilization	miR319c	GSMUA_Achr5T03100_001_BHLH_transcription_factor,_putative,_expressed	2.5	22.794	1	20	708	726	CUUGGACUGAAGGGAGCUGC	GCAG-UUCCUUCAGUCCAAG	Cleavage
sexual reproduction	miR319c	GSMUA_Achr5T03100_001_BHLH_transcription_factor,_putative,_expressed	2.5	22.794	1	20	708	726	CUUGGACUGAAGGGAGCUGC	GCAG-UUCCUUCAGUCCAAG	Cleavage
flower development	miR319c	GSMUA_Achr6T09330_001_Putative_Histone_acetyltransferase_HAC1	3	13.321	1	21	237	257	UUGGACUGAAGGGGGCUCCCU	AGGAAGCCUCCUUCAGUCCUA	Cleavage
vegetative to reproductive phase transition of meristem	miR319c	GSMUA_Achr6T09330_001_Putative_Histone_acetyltransferase_HAC1	3	13.321	1	21	237	257	UUGGACUGAAGGGGGCUCCCU	AGGAAGCCUCCUUCAGUCCUA	Cleavage
pollen development	miR319c	GSMUA_AchrUn_randomT03410_001_Phosphoribosylaminoimidazole_carboxylase,_chloroplastic_(Fragment)	3	18.504	1	22	436	457	CUAGGACUGAAGGGAGCUCCCC	GAGGAGCUUCCUUCAGUUGUGG	Cleavage
multicellular organism reproduction	miR319c	GSMUA_AchrUn_randomT15100_001_Putative_Transcription_factor_GAMYB	1	21.915	1	20	1007	1026	UUGGAGUGAAGGGAGCUCCC	UGGAGCUCCCUUCACUCCAA	Cleavage
pollen development	miR319c	GSMUA_AchrUn_randomT15100_001_Putative_Transcription_factor_GAMYB	1	21.915	1	20	1007	1026	UUGGAGUGAAGGGAGCUCCC	UGGAGCUCCCUUCACUCCAA	Cleavage
reproductive process in a multicellular organism	miR319c	GSMUA_AchrUn_randomT15100_001_Putative_Transcription_factor_GAMYB	1	21.915	1	20	1007	1026	UUGGAGUGAAGGGAGCUCCC	UGGAGCUCCCUUCACUCCAA	Cleavage
sexual reproduction	miR319c	GSMUA_AchrUn_randomT15100_001_Putative_Transcription_factor_GAMYB	1	21.915	1	20	1007	1026	UUGGAGUGAAGGGAGCUCCC	UGGAGCUCCCUUCACUCCAA	Cleavage
floral whorl development	miR390	GSMUA_Achr8T20090_001_Homeobox-leucine_zipper_protein_ATHB-15	2.5	13.867	1	20	1763	1782	AAGGUCAGGAGGGAUAGCGC	GUGUUAUUCCUCUUGACUUU	Cleavage
flower development	miR390	GSMUA_Achr8T20090_001_Homeobox-leucine_zipper_protein_ATHB-15	2.5	13.867	1	20	1763	1782	AAGGUCAGGAGGGAUAGCGC	GUGUUAUUCCUCUUGACUUU	Cleavage
flower development	miR390	GSMUA_Achr9T14090_001_Auxin_response_factor_5	3	20.636	1	20	830	849	AAGCUCUGGAGGGAUAGCGC	GGGCUAGCCCUUCAGAGUUU	Cleavage
fruit development	miR394	GSMUA_Achr2T14850_001_Somatic_embryogenesis_receptor_kinase_2	3	21.303	1	20	1748	1767	UUGCCAUUCUGUCCACCUCU	AGAGAUGGGAGGAAUGGCAA	Translation
pollen development	miR394	GSMUA_Achr2T14850_001_Somatic_embryogenesis_receptor_kinase_2	3	21.303	1	20	1748	1767	UUGCCAUUCUGUCCACCUCU	AGAGAUGGGAGGAAUGGCAA	Translation
fruit development	miR396	GSMUA_Achr10T26930_001_Putative_Heat_shock_protein_90	2.5	9.258	1	21	1009	1029	UUCCACAGCUUUCUUGAUUUU	AAAACUAAGAAAGUUGUGGAG	Cleavage
vegetative to reproductive phase transition of meristem	miR396	GSMUA_Achr11T08770_001_Putative_ZOS1-20_-_C2H2_zinc_finger_protein,_expressed	3	17.522	1	21	2139	2159	UCCACAGGCUUUCUUGAAGUG	UGCUUCAGUAAAGUUUGUGGA	Cleavage
pollen development	miR396	GSMUA_Achr1T15030_001_Callose_synthase_3	2.5	23.447	1	20	1262	1281	UUCCAAAGCUUUCUUGAAAU	AUUACCGGAAAGCUUUGGAA	Cleavage
fruit development	miR396	GSMUA_Achr2T16780_001_Beta-galactosidase	3	19.251	1	20	1149	1169	UCAACAGG-CUUUCAUGAACU	AGUUCCUGAAAGGCCUGUUGA	Translation
floral whorl development	miR396	GSMUA_Achr3T06800_001_MADS-box_transcription_factor_22	2	21.957	1	20	83	102	UUCCGCAGCUUUCUUGAACU	UGUUCAAGAAGGCUGCGGAG	Cleavage
flower development	miR396	GSMUA_Achr3T06800_001_MADS-box_transcription_factor_22	2	21.957	1	20	83	102	UUCCGCAGCUUUCUUGAACU	UGUUCAAGAAGGCUGCGGAG	Cleavage
flower development	miR396	GSMUA_Achr3T10970_001_Heat_shock_protein_81-3	3	21.362	1	21	1153	1173	UUCCACAGCUUUUUUGAACUU	GAGAGCAAAAAGGCUGUGGAG	Cleavage
pollination	miR396	GSMUA_Achr6T06260_001_Phosphatidylinositol-4-phosphate_5-kinase_2	3	23.389	1	21	927	947	UUCCACAGCUGUGUUGAACUU	AGGUUCAGCACAGCUGAGGGA	Cleavage
fruit development	miR396	GSMUA_Achr6T30550_001_bZIP_transcription_factor_TRAB1	3	16.642	1	20	938	957	UUCCACAGCUUUCUUGAAGG	CUCUCGAGAAAGUUGUGGAG	Cleavage
fruit development	miR396	GSMUA_Achr7T02210_001_Pyrophosphate--fructose_6-phosphate_1-phosphotransferase_subunit_beta	3	22.426	1	21	698	718	AUCCAGAGCUUUCUUGAACUU	AAGUUCCAGCAAGUUUUGGAU	Cleavage
fruit development	miR396b	GSMUA_Achr9T02970_001_Putative_N-alpha-acetyltransferase_15,_NatA_auxiliary_subunit	3	21.24	1	21	937	957	UUCCACGGCUUUCUUGAACUU	AAGUUUCAGGAAGCCGUGGAU	Cleavage
fruit development	miR397	GSMUA_Achr3T07370_001_Putative_Preprotein_translocase_subunit_secY	3	21.456	1	21	594	614	AUUGAGUGCAGCGUUGAUGAG	UUCUUCAAUGCAGUACUCAAU	Translation
vegetative to reproductive phase transition of meristem	miR397	GSMUA_Achr8T20780_001_Laccase-17	1.5	17.32	1	20	697	716	UCAUUGAGUGCAGCGUUGAU	AUCAACGCUGCACUCAACGA	Cleavage
floral whorl development	miR5179	GSMUA_Achr9T20950_001_MADS-box_transcription_factor_16	1	15.163	1	20	361	380	UUUUGCUCAAGACCGCGCAA	CUGCGCGGUCUUGAGCAAAA	Cleavage
flower development	miR5179	GSMUA_Achr9T20950_001_MADS-box_transcription_factor_16	1	15.163	1	20	361	380	UUUUGCUCAAGACCGCGCAA	CUGCGCGGUCUUGAGCAAAA	Cleavage
pollen development	miR529	GSMUA_Achr11T19580_001_Putative_Squamosa_promoter-binding-like_protein_18	3	13.901	1	20	802	821	AGAAGAGAGAGAGUACAGUC	GAUCGUGCUCACUCUCUUCU	Translation
pollen tube development	miR529	GSMUA_Achr9T03750_001_Rop_guanine_nucleotide_exchange_factor_1	2.5	20.14	1	21	133	153	AGAAGAGAGAGACUACAGCCU	AGGCUGGAGCCUCUUUCUUCU	Cleavage
pollination	miR529	GSMUA_Achr9T03750_001_Rop_guanine_nucleotide_exchange_factor_1	2.5	20.14	1	21	133	153	AGAAGAGAGAGACUACAGCCU	AGGCUGGAGCCUCUUUCUUCU	Cleavage
pollen development	miR535	GSMUA_Achr2T09710_001_Putative_Whole_genome_shotgun_sequence_of_line_PN40024,_scaffold_3.assembly12x_(Fragment)	2.5	15.964	1	20	82	101	UGACACCGAGAGAGAGCAGG	CCUGUGGUCUCUCGGUGUCA	Cleavage
pollen development	miR535	GSMUA_Achr3T27750_001_Putative_Squamosa_promoter-binding-like_protein_12	2.5	17.967	1	20	1132	1152	UGACA-AAGAGAGAGAGCACG	CGUGCUCUCUCUCUUCUGUCA	Cleavage
floral whorl development	miR535	GSMUA_Achr4T04470_001_Mitogen-activated_protein_kinase_2	3	20.985	1	20	1178	1197	UGACAAAGAGAGAGAGCACG	UGUGCUAUCUUCCUUUGUCA	Translation
flower development	miR535	GSMUA_Achr4T04470_001_Mitogen-activated_protein_kinase_2	3	20.985	1	20	1178	1197	UGACAAAGAGAGAGAGCACG	UGUGCUAUCUUCCUUUGUCA	Translation
fruit development	miR535	GSMUA_Achr4T12260_001_Pentatricopeptide_repeat-containing_protein_At4g21190	3	13.514	1	19	10	29	UCACAACG-AGAGAGAGCAC	GUGCUCUCUCUUCGUUGUGC	Translation
pollen development	miR535	GSMUA_Achr4T32520_001_Calcium-transporting_ATPase_1,_plasma_membrane-type	3	17.28	1	20	1893	1912	UGACAACGAGAGCGAGCACG	UGUGGUCGCUCUAGUUGUUA	Cleavage
sexual reproduction	miR535	GSMUA_Achr4T32520_001_Calcium-transporting_ATPase_1,_plasma_membrane-type	3	17.28	1	20	1893	1912	UGACAACGAGAGCGAGCACG	UGUGGUCGCUCUAGUUGUUA	Cleavage
vegetative to reproductive phase transition of meristem	miR535	GSMUA_Achr6T22280_001_Putative_Squamosa_promoter-binding-like_protein_17	2.5	22.248	1	20	901	921	UGACA-AAGAGAGAGAGCACG	UGUGCUCUCUCUCUUCUGUCA	Cleavage
pollination	miR535	GSMUA_Achr9T00400_001_Putative_S-locus-specific_glycoprotein_S13	3	18.415	1	21	843	862	UUGACAACGAGAAAGAGCACG	UGUGUUCUUUC-CGUUGUCGA	Translation
recognition of pollen	miR535	GSMUA_Achr9T00400_001_Putative_S-locus-specific_glycoprotein_S13	3	18.415	1	21	843	862	UUGACAACGAGAAAGAGCACG	UGUGUUCUUUC-CGUUGUCGA	Translation
fruit development	miR828a	GSMUA_Achr10T14030_001_Transcription_repressor_MYB5	3	13.759	1	22	397	418	UCUUGCUCAGGUGAGUAUUCCA	UGGAACACCCACCUCAGCAAGA	Cleavage
fruit development	miR828a	GSMUA_Achr7T10880_001_ATP-binding_domain-containing_protein,_putative,_expressed	2.5	15.039	1	20	1177	1196	UCUUGCUCGAGUGAGUAUUC	AAAUACUCACUCGAGGAAGA	Cleavage

## Sheet: miRNAs related to pigment
Supplementary Data 9:miRNA involve in pigment biosynthesis
Related Type	miRNA_Acc.	Target	Expectation	UPE	miRNA_start	miRNA_end	Target_start	Target_end	miRNA_aligned_fragment	Target_aligned_fragment	Inhibition
phenylpropanoid metabolic process	miR159	GSMUA_Achr11T00410_Putative_Myb-related_protein_Myb4	3	14.236	1	20	237	256	UGACGGCGAGAGAGAGCACG	CGUCGUCUCCCUCGCCGUCA	Translation
	miR168	GSMUA_Achr3T22530_Chalcone_synthase_J	1	12.109	1	21	675	695	UCAUUGAGUGCAGCGUUGAUG	CAUCAACGCUGCCCUCAAUGA	Translation
	miR397	GSMUA_Achr3T15320_Laccase-2	2.5	24.658	1	20	570	589	UGGCUUGGUGCAGGUCGGGA	UCCCGAUCAGAACCAAGCCA	Translation
	miR535	GSMUA_Achr8T13230_4-coumarate--CoA_ligase-like_4	2.5	17.454	1	23	343	365	CUCUUGCUCAAGUGAGUAUUCCA	UGGAAUACUCACUUGUGCAAAAG	Cleavage
	miR828a	GSMUA_Achr8T14540_Putative_Myb-related_protein_308	3	23.989	1	20	93	112	ACGGACCUGGCUUCAUUCCC	GGGGAUGAAGCGAGGCCCGU	Translation
